# Supplementary material for: Palladium(ii)-catalyzed synthesis of indenones through the cyclization of benzenecarbaldehydes with internal alkynes
Source: Royal Society of Chemistry journal article supplement (doi:10.1039/c9ra03921j), 2019-01-01
Supplement: c9ra03921j1.pdf [file c9ra03921j1.pdf]

## Supporting Information

### **Palladium(II) Catalyzed Synthesis of Indenones through Cyclization of Benzenecarbaldehydes with internal Alkynes**

*Jajula Kashanna<sup>a\*</sup>, Rathod Arvind Kumar<sup>b</sup> and Ravada Kishore,<sup>c</sup>*

Department of Chemistry, Rajiv Gandhi University of Knowledge Technologies Basar-504107,

India;Email: [jajulakashanna@yahoo.co.in](mailto:jajulakashanna@yahoo.co.in)

# $^1\text{H}$ and $^{13}\text{C}$ spectra of some Indenones

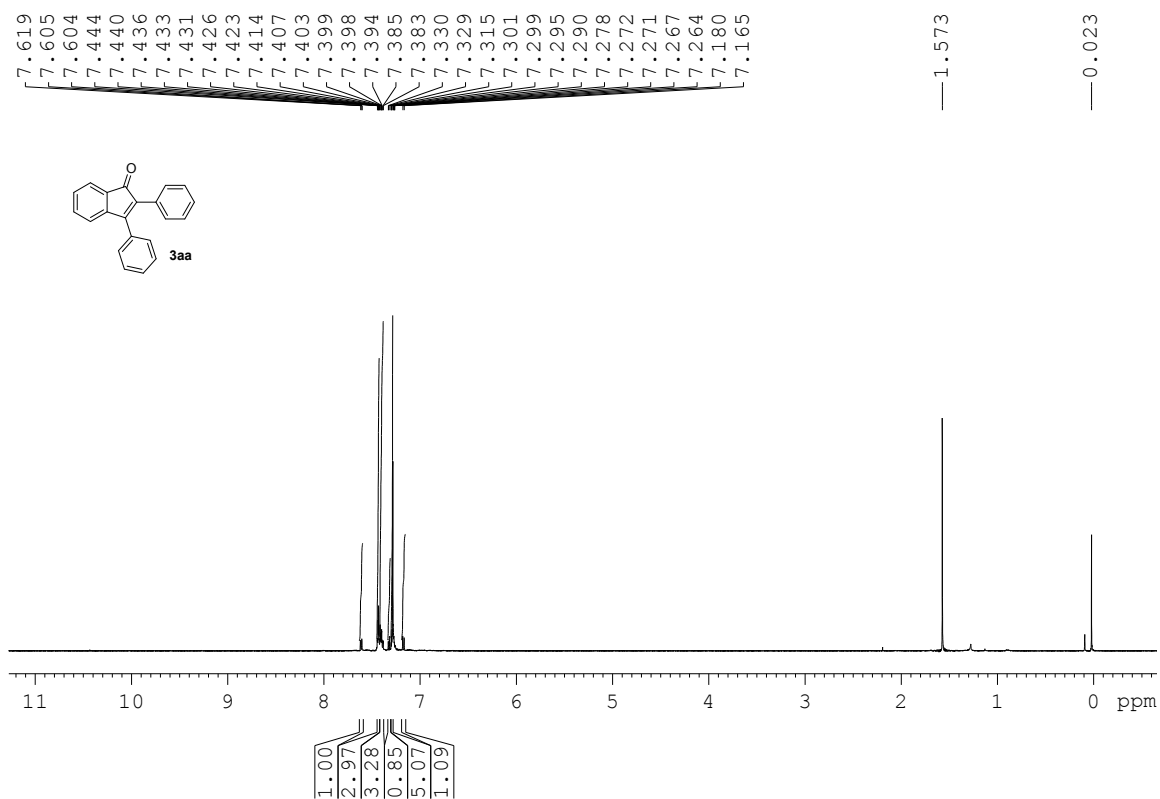

Figure S11.  $^1\text{H}$  NMR spectrum of compound 3aa

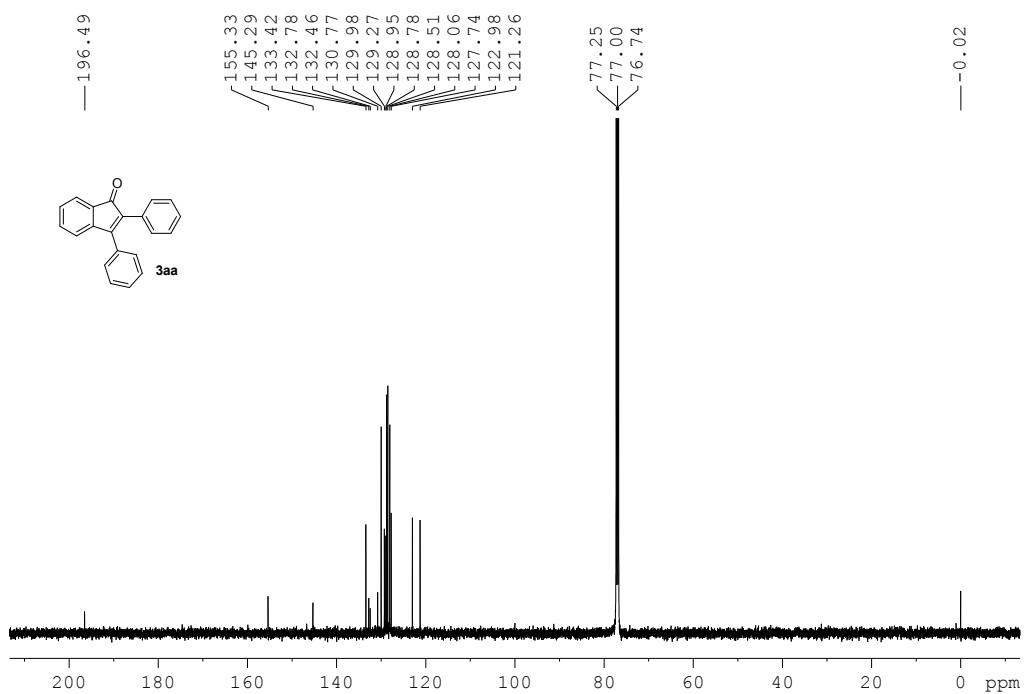

Figure S12.  $^{13}\text{C}$  NMR spectrum of compound 3aa

(HRMS (ESI) Calcd. for C<sub>21</sub>H<sub>15</sub>O [M+H]: *m/z* 283.1124. Found: 283.1123)

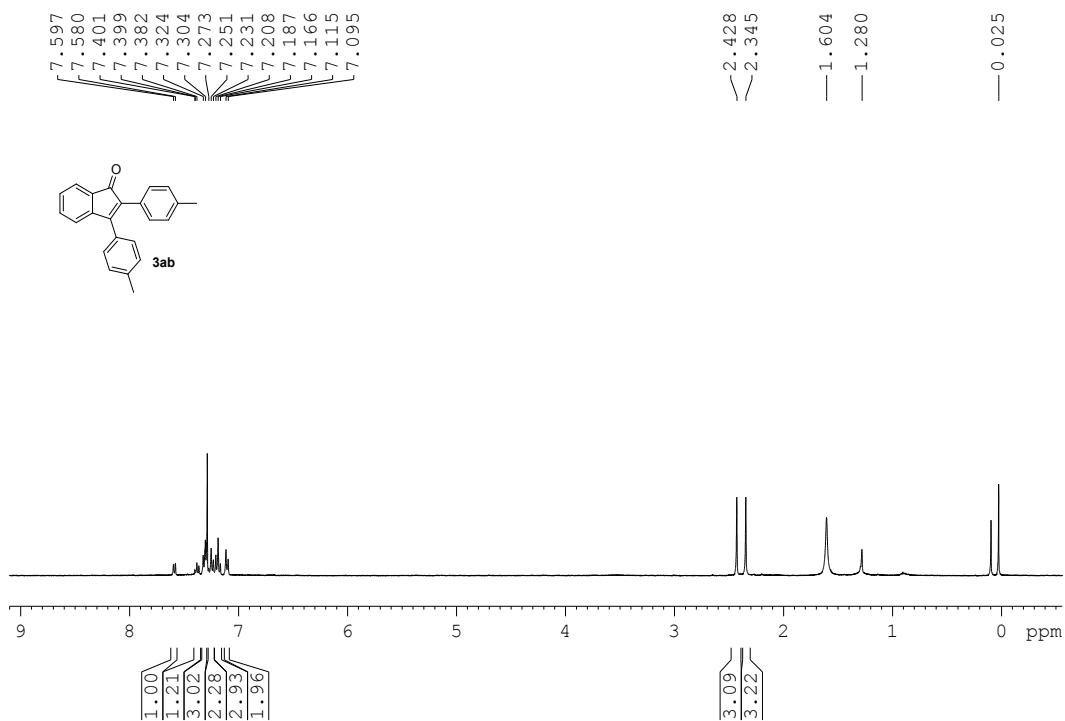

**Figure S13.** <sup>1</sup>H NMR spectrum of compound **3ab**

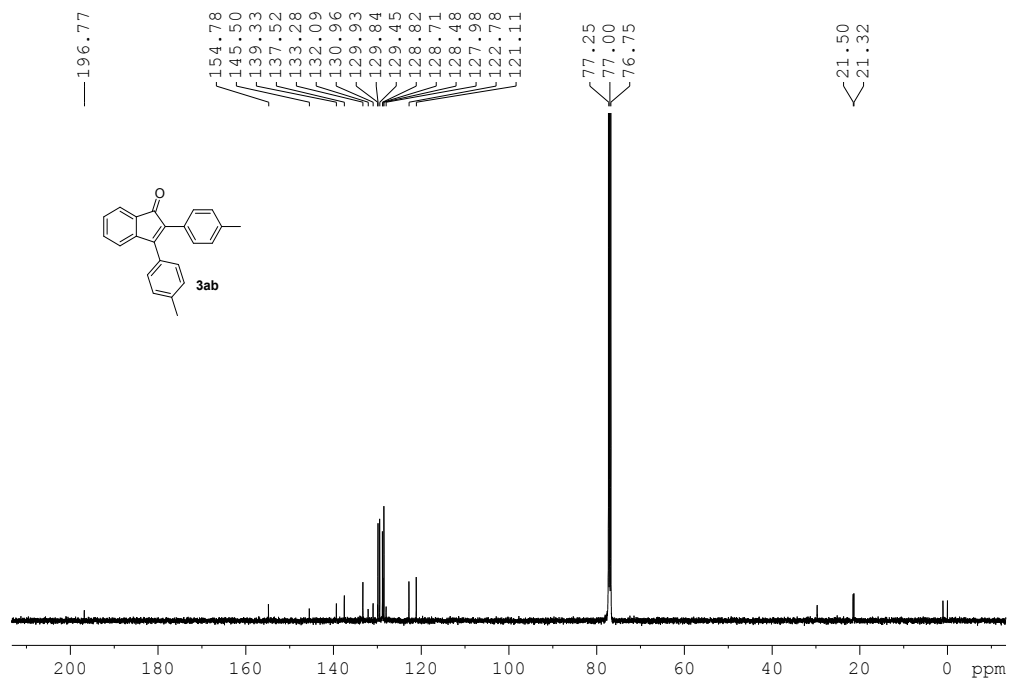

**Figure S14.** <sup>13</sup>C NMR spectrum of compound **3ab**

(HRMS (ESI) Calcd. for C<sub>23</sub>H<sub>19</sub>O [M+H]: *m/z* 311.1436. Found: 311.136)

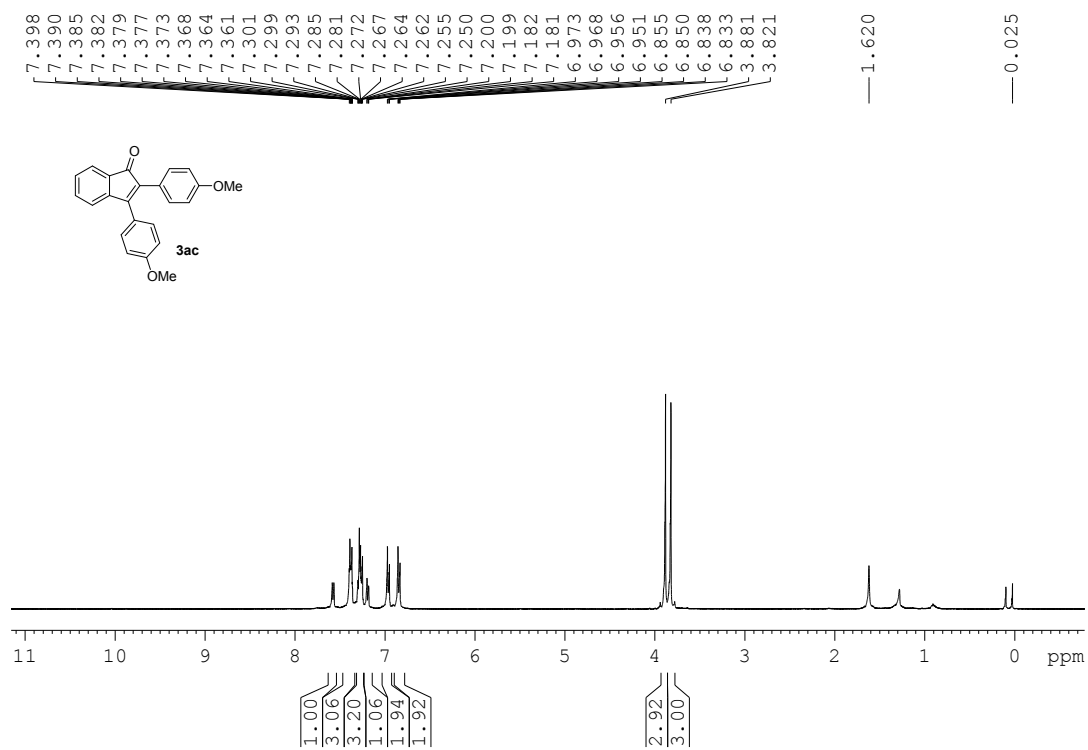

Figure S15. <sup>1</sup>H NMR spectrum of compound **3ac**

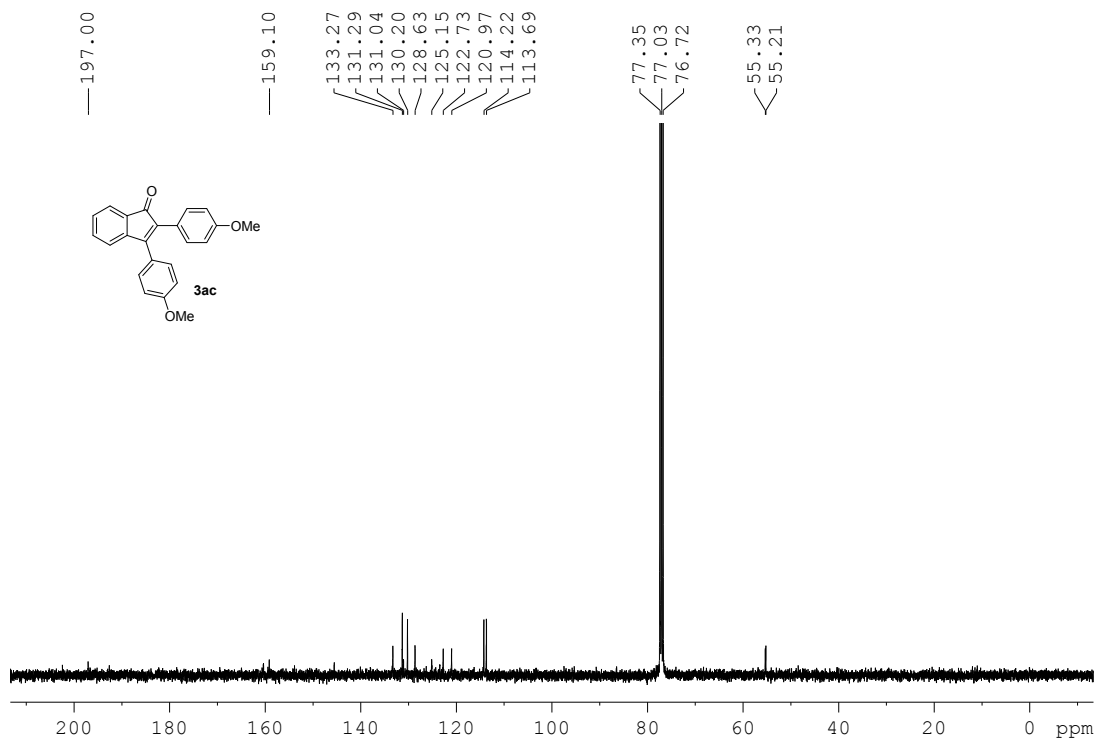

Figure S16. <sup>13</sup>C NMR spectrum of compound **3ac**

(HRMS (ESI) Calcd. for C<sub>23</sub>H<sub>19</sub>O<sub>3</sub> [M+H]: *m/z* 343.1335. Found: 343.1335)

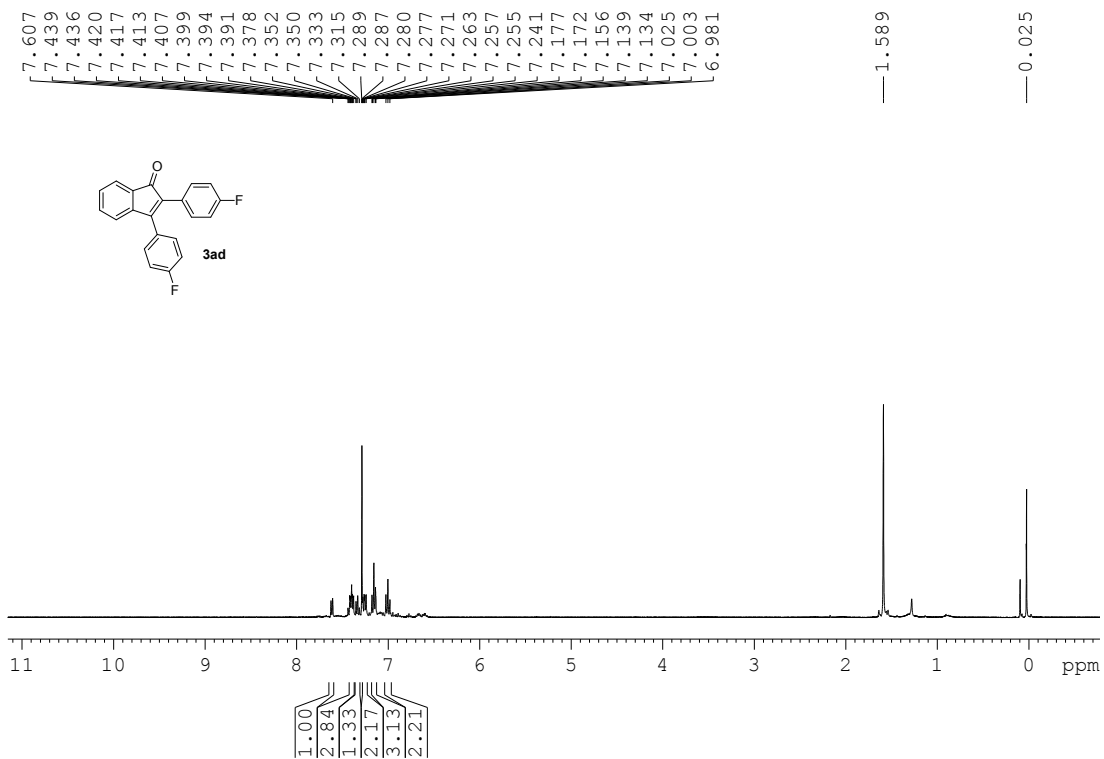

**Figure S17.** <sup>1</sup>H NMR spectrum of compound **3ad**

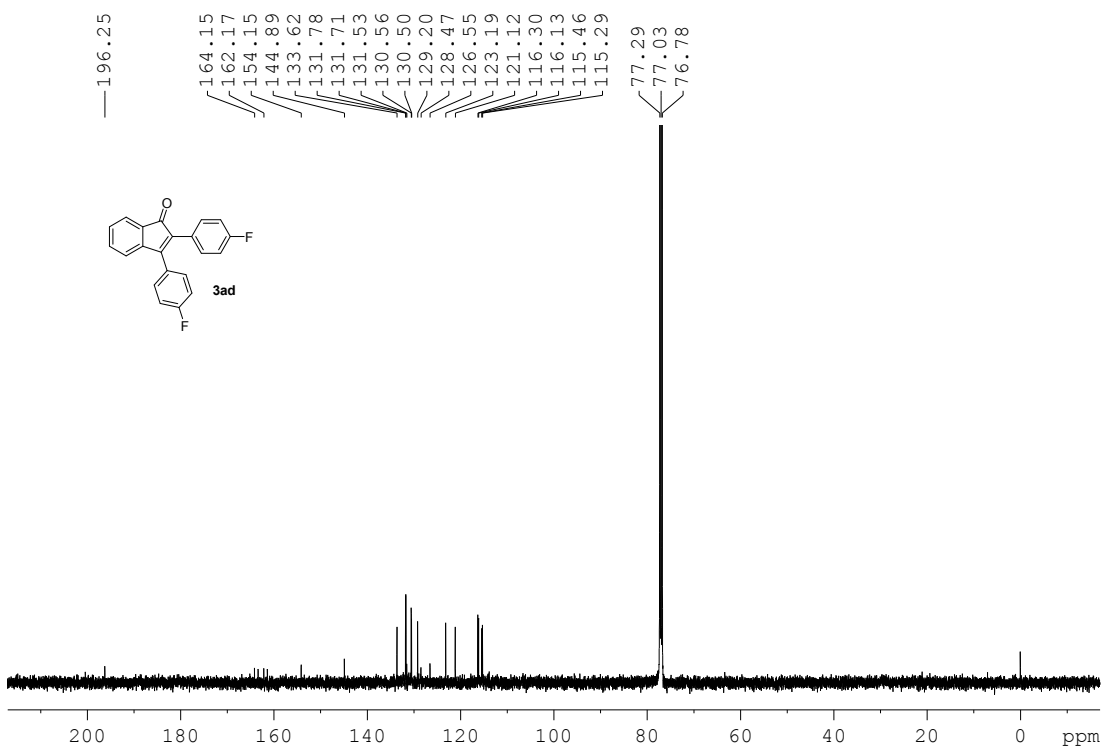

**Figure S18.** <sup>13</sup>C NMR spectrum of compound **3ad**

(HRMS (ESI) Calcd. for C<sub>21</sub>H<sub>12</sub>F<sub>2</sub>O<sub>2</sub> [M+H]: *m/z* 319.0935. Found: 319.0959)

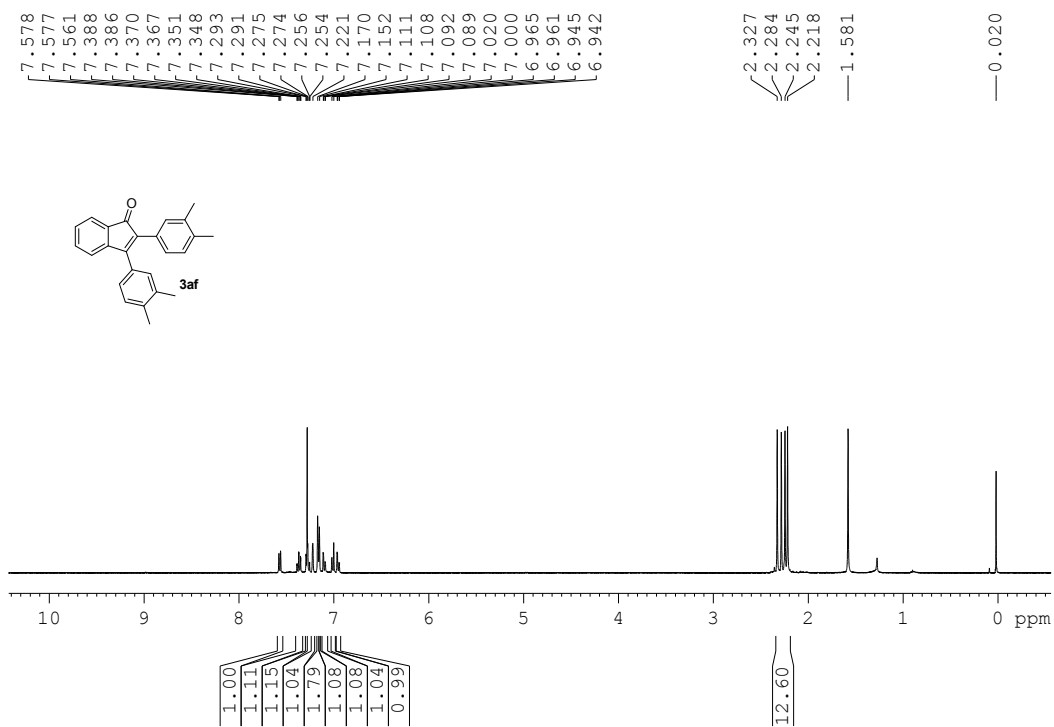

Figure S19. <sup>1</sup>H NMR spectrum of compound 3af

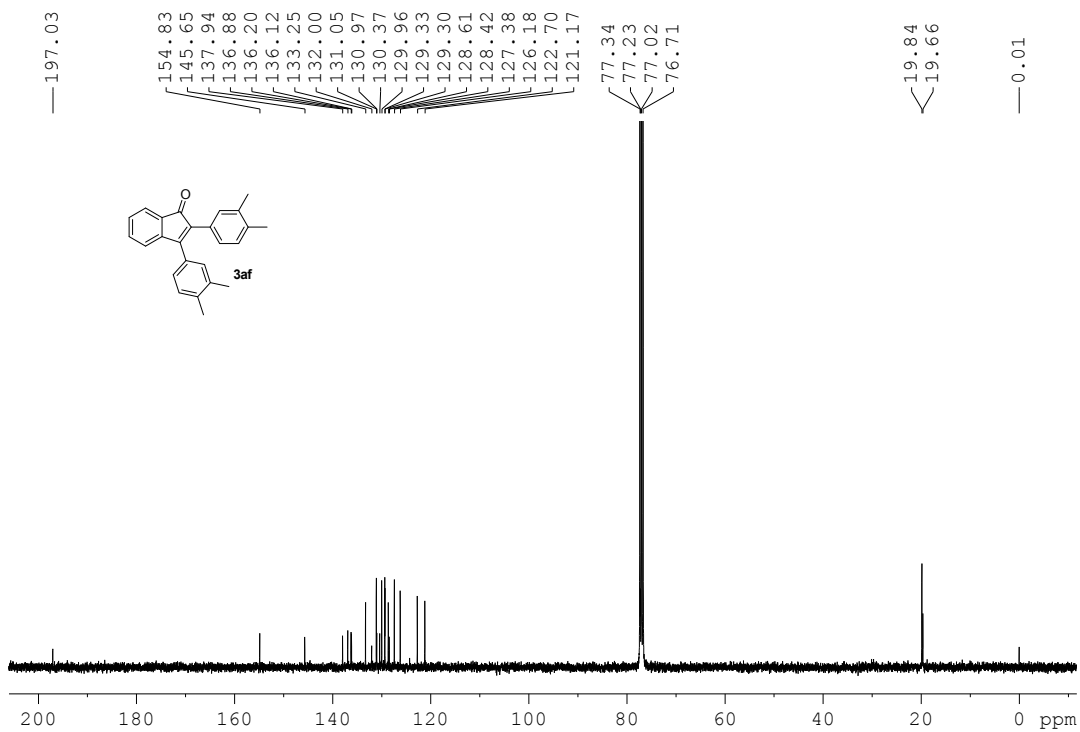

Figure S20. <sup>13</sup>C NMR spectrum of compound 3af

(HRMS (ESI) Calcd. for C<sub>25</sub>H<sub>22</sub>ONa [M+Na]: *m/z* 361.1568. Found: 361.1570)

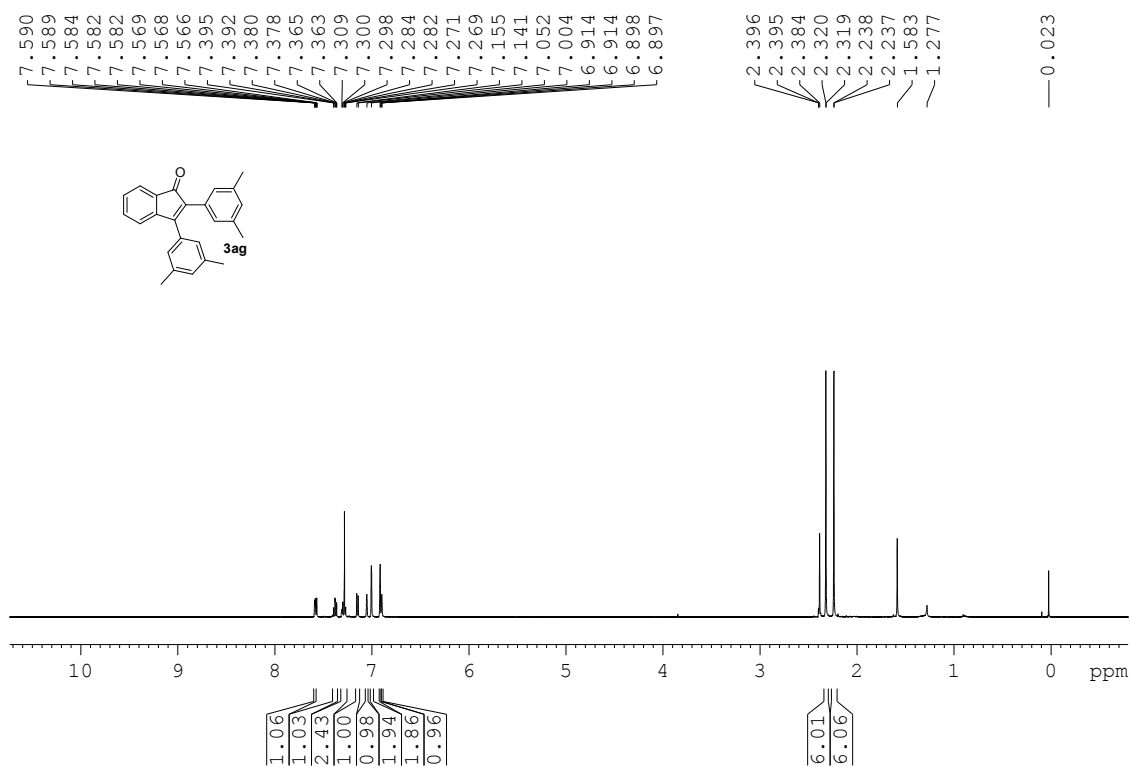

Figure S21. <sup>1</sup>H NMR spectrum of compound **3ag**

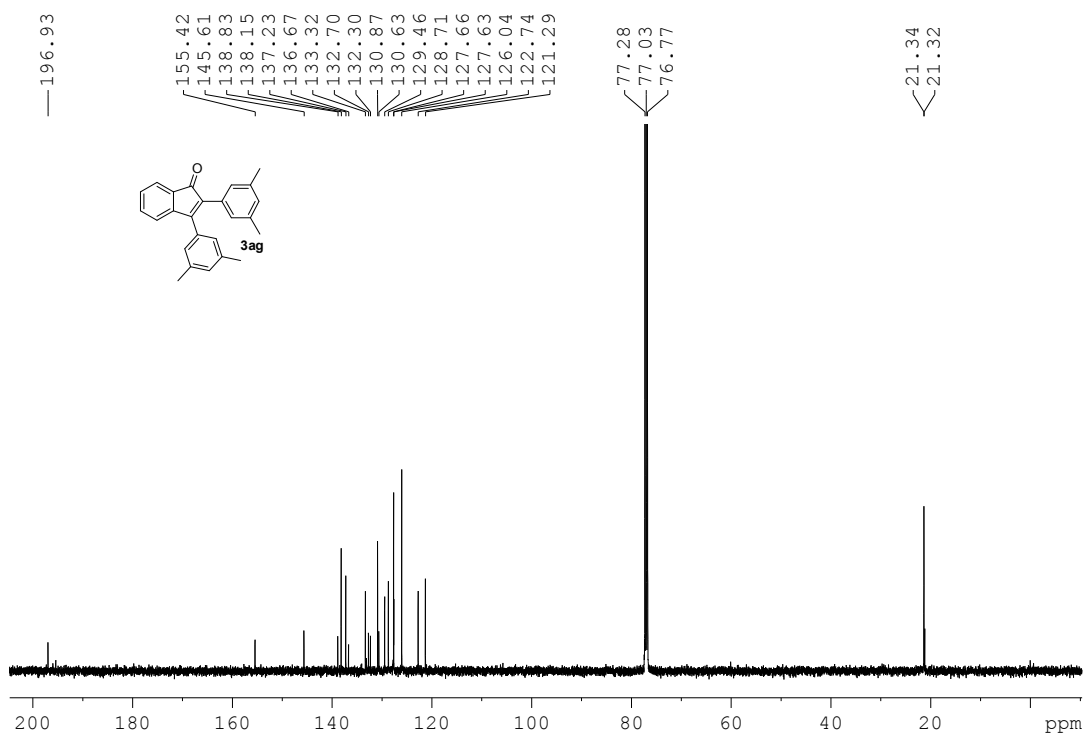

Figure S22. <sup>13</sup>C NMR spectrum of compound **3ag**

(HRMS (ESI) Calcd. for C<sub>25</sub>H<sub>22</sub>ONa [M+Na]: *m/z* 361.1568. Found: 361.1567)

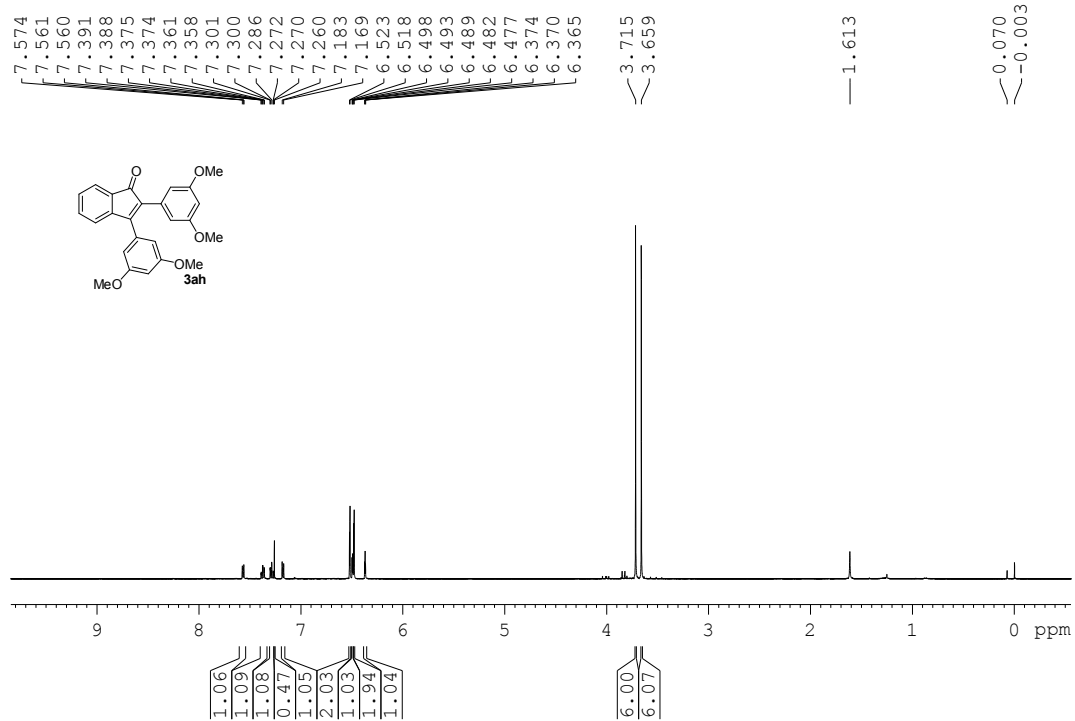

**Figure S23.** <sup>1</sup>H NMR spectrum of compound **3ah**

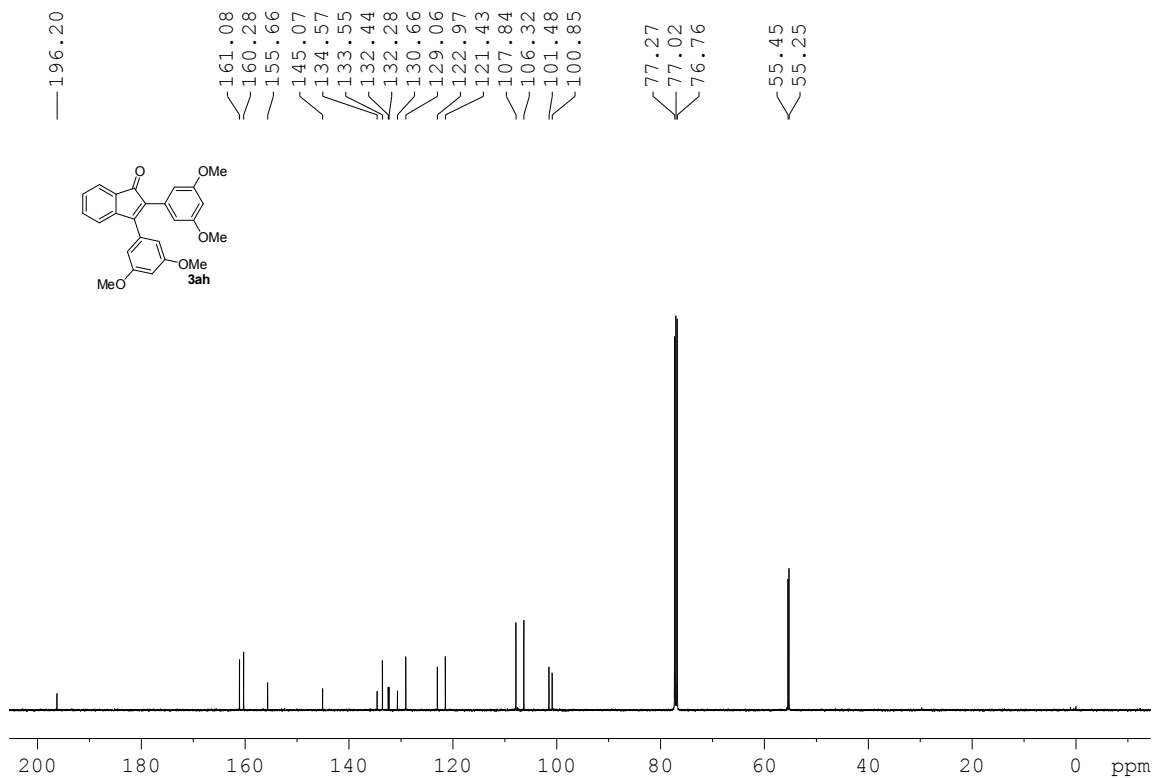

**Figure S24.** <sup>13</sup>C NMR spectrum of compound **3ah**



(HRMS (ESI) Calcd. for C<sub>25</sub>H<sub>22</sub>O<sub>5</sub>Na [M+Na]: *m/z* 425.1365. Found: 425.1362)

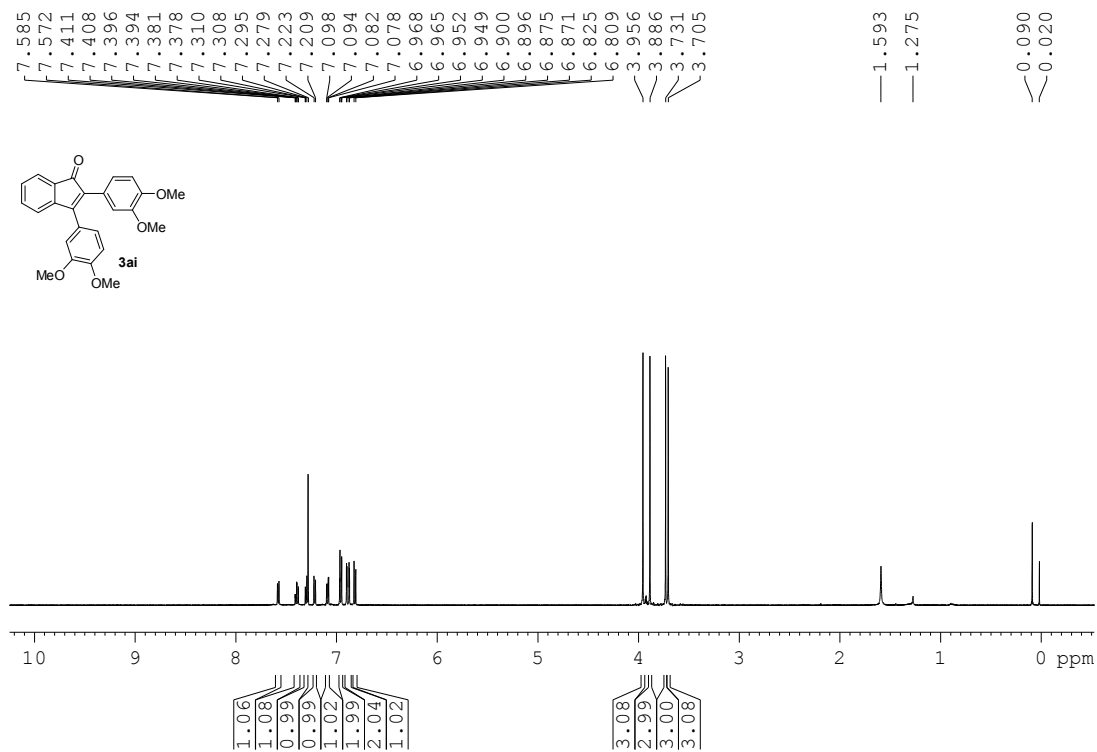

Figure S25. <sup>1</sup>H NMR spectrum of compound **3ai**

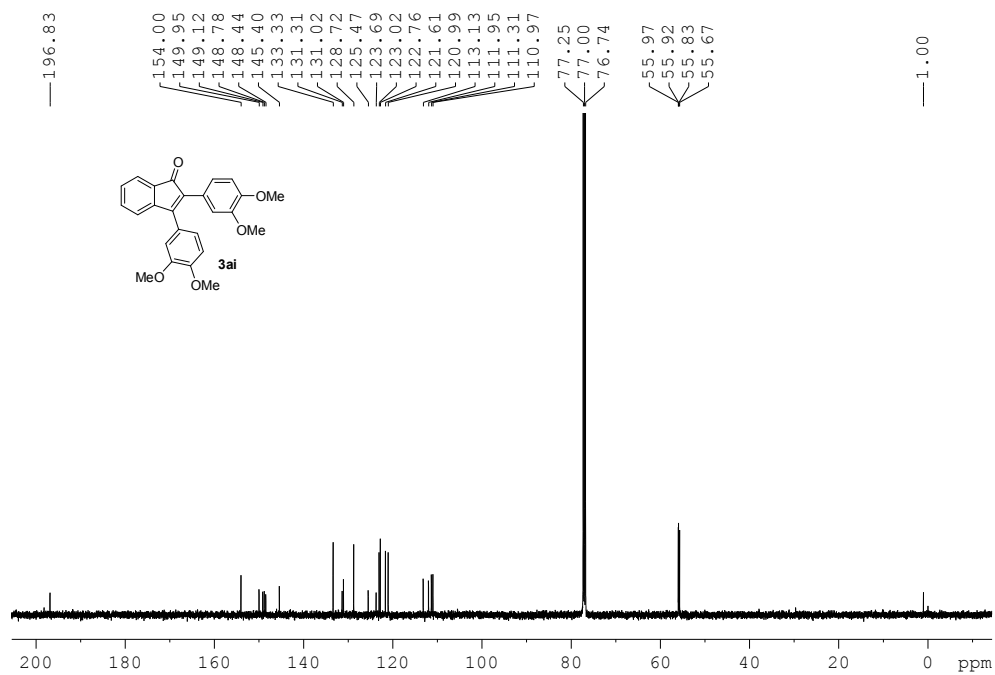

Figure S26. <sup>13</sup>C NMR spectrum of compound **3ai**

(HRMS (ESI) Calcd. for  $C_{25}H_{22}O_5Na$   $[M+Na]$ :  $m/z$  425.1365. Found: 425.1363)

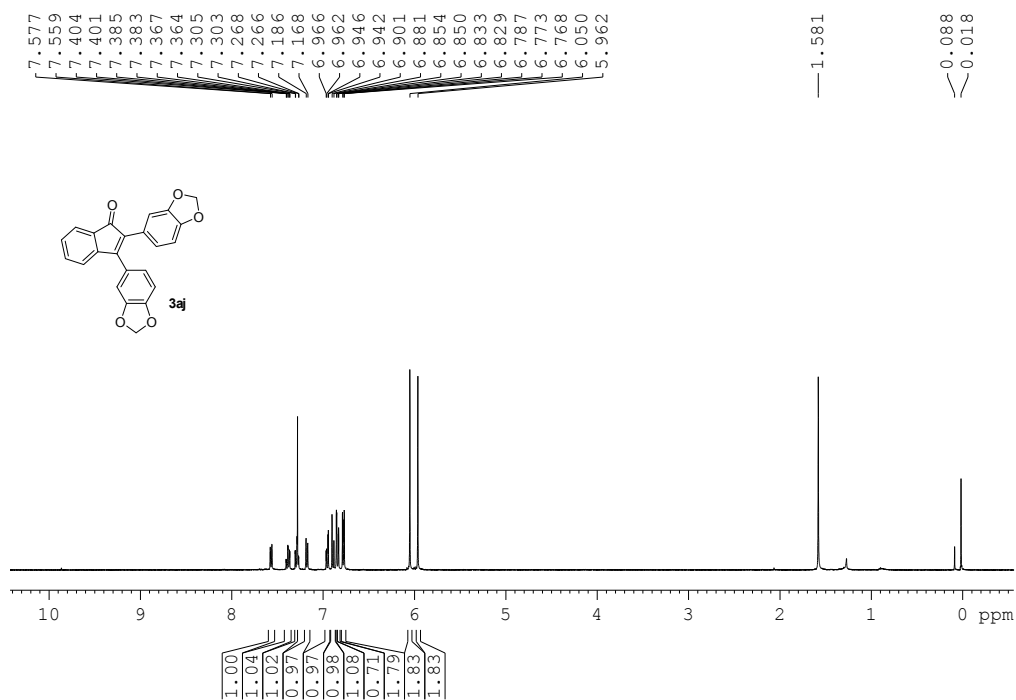

**Figure S27.**  $^1H$  NMR spectrum of compound **3aj**

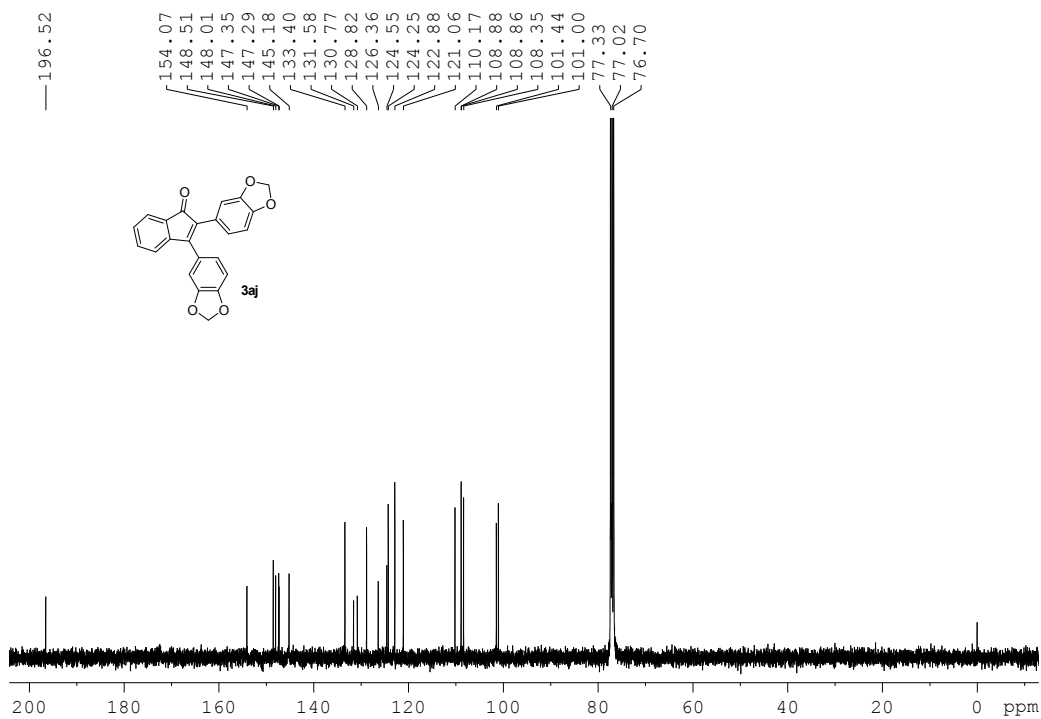

**Figure S28.**  $^{13}C$  NMR spectrum of compound **3aj**

(HRMS (ESI) Calcd. for  $C_{23}H_{15}O_5$   $[M+H]$ :  $m/z$  371.0919. Found: 371.0917)

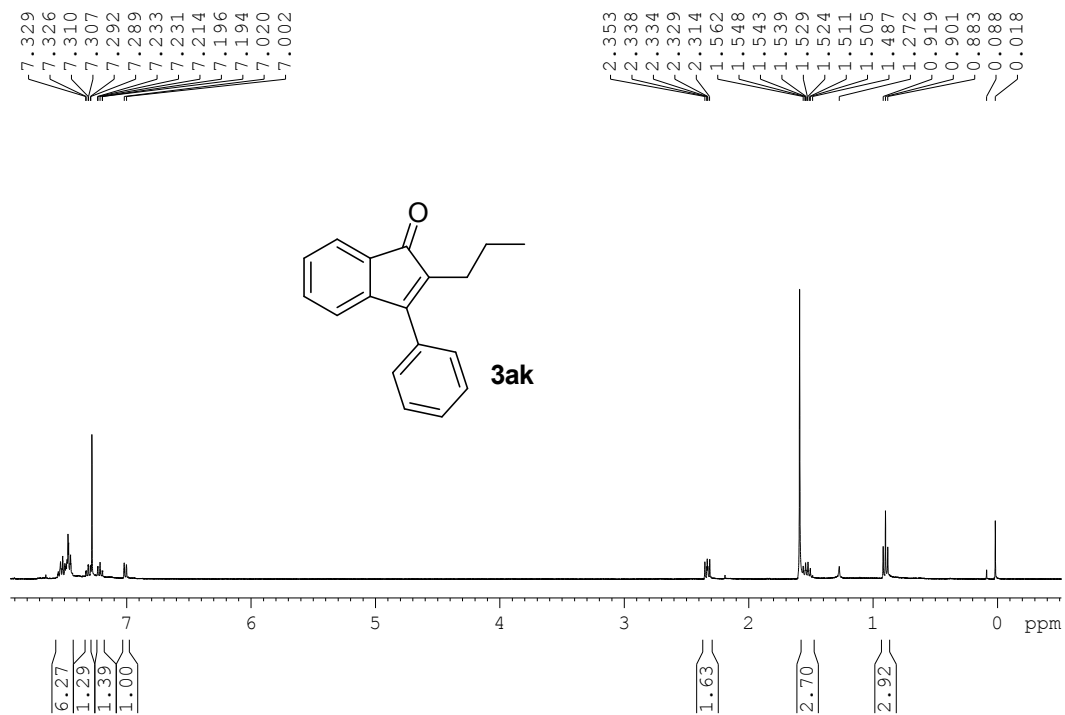

**Figure S29.** <sup>1</sup>H NMR spectrum of compound **3ak**

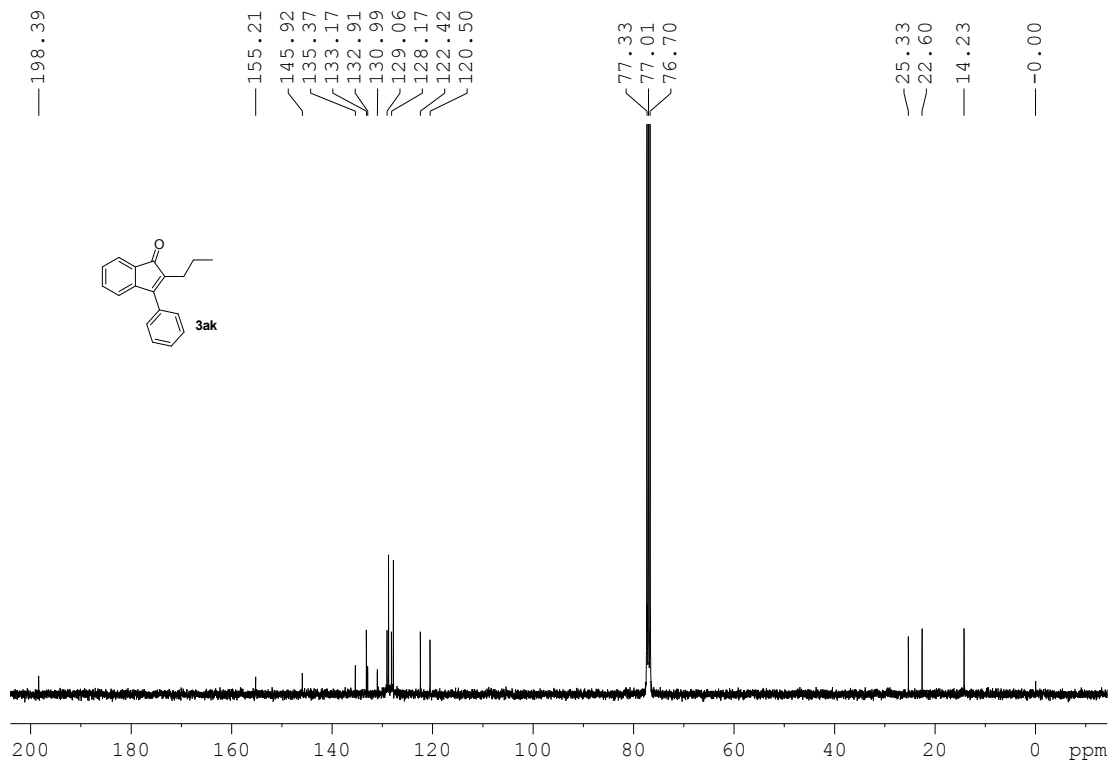

**Figure S30.** <sup>13</sup>C NMR spectrum of compound **3ak**

(HRMS (ESI) Calcd. for C<sub>17</sub>H<sub>15</sub>O [M+H]: *m/z* 235.1124. Found: 235.1100)
